# Supplementary material
Source: PubMed Central journal article supplement (PMC3014305)
Supplement: supp_110.171850_171850Supplement_data.pdf [file supp_110.171850_171850Supplement_data.pdf]

**Mechanisms of pyrethroid insecticide-induced stimulation of calcium influx in  
neocortical neurons**

Zhengyu Cao, Timothy J. Shafer and Thomas F. Murray

Journal: The Journal of Pharmacology and Experimental Therapeutics

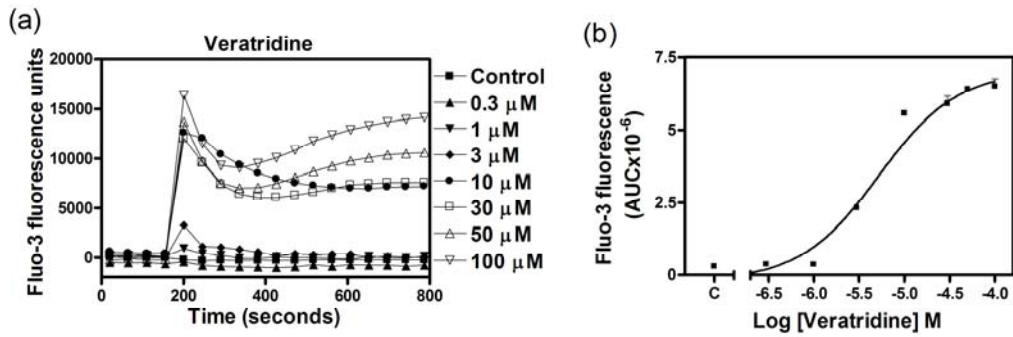

Supplemental Figure 1. Time- (a) and concentration- (b) response relationships for veratridine-induced  $\text{Ca}^{2+}$  influx in neocortical neurons. This experiment was performed simultaneously with other 11 pyrethroids in a 96 well plate and was repeated three times with similar results.

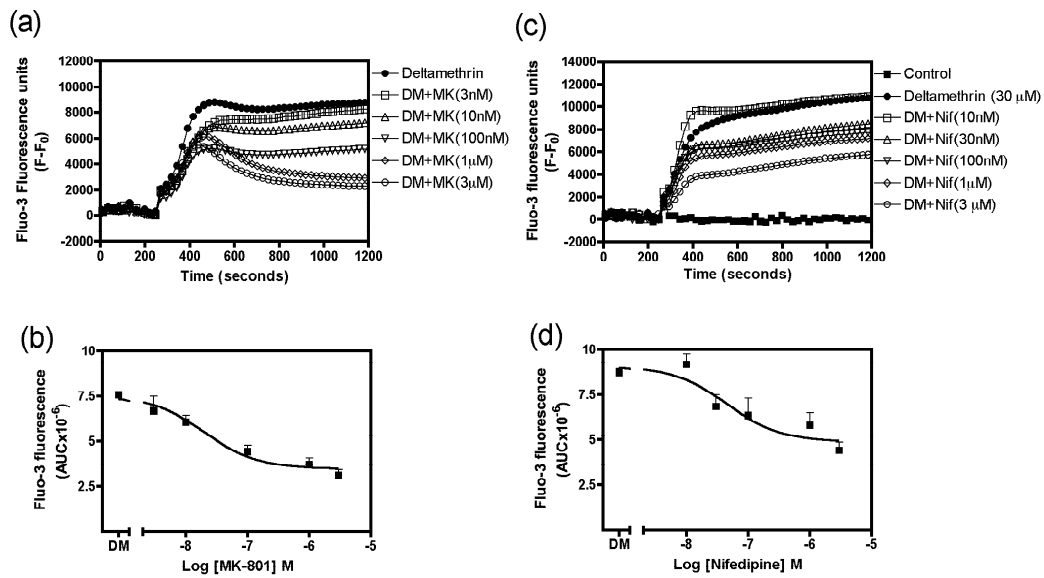

Supplemental Figure 2. Effects of MK-801 or nifedipine on the elevation of  $[\text{Ca}^{2+}]_i$  induced by 30  $\mu\text{M}$  deltamethrin. (a), (c) Time-response relationships for MK-801 and nifedipine inhibition of deltamethrin-induced  $\text{Ca}^{2+}$  influx, respectively; (b), (d) Concentration-response relationships for MK-801 and nifedipine inhibition of deltamethrin-induced  $\text{Ca}^{2+}$  influx, respectively. These data were performed twice in quadruplicate with similar results.

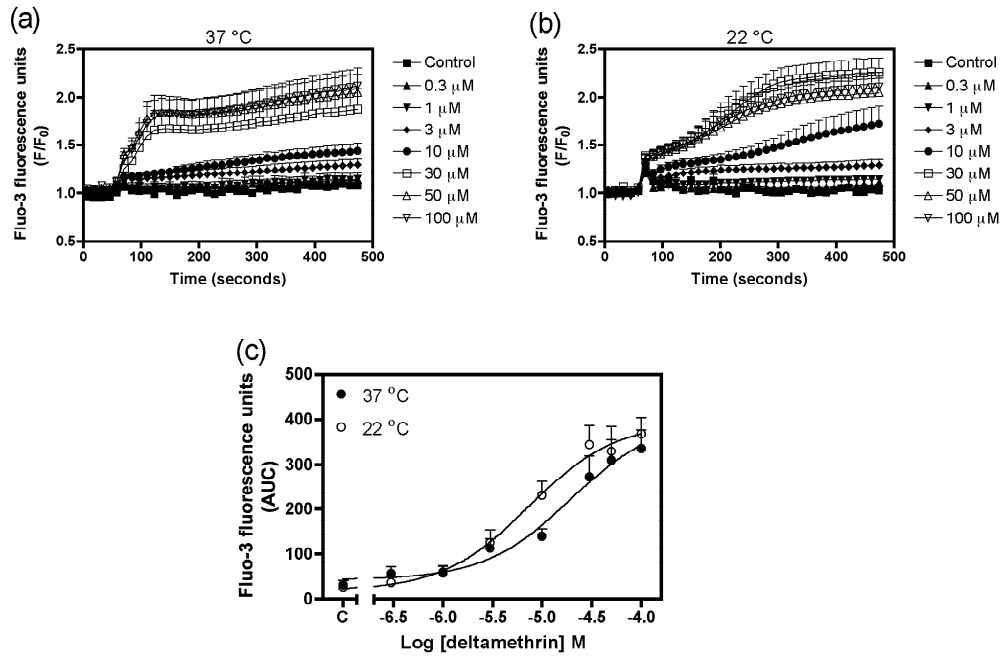

Supplemental Figure 3. Temperature dependence for deltamethrin-induced  $\text{Ca}^{2+}$  influx. (a), (b) Time-response relationships for deltamethrin-induced  $\text{Ca}^{2+}$  influx at 37 and 22 °C, respectively; (c) Concentration-response relationships for deltamethrin-induced  $\text{Ca}^{2+}$  influx at 37 and 22 °C. Data were pooled from two experiments performed in quadruplicate.
